# Observations and analysis of absorption lines including $J = K$ rotational levels of $\text{CH}_3\text{CN}$ : the envelope of Sagittarius B2(M)

Mitsunori Araki<sup>1,2\*</sup>, Shuro Takano<sup>3</sup>, Nobuhiko Kuze<sup>4</sup>, Yoshiaki Minami<sup>1</sup>, Takahiro Oyama<sup>1</sup>, Kazuhisa Kamegai<sup>5</sup>, Yoshihiro Sumiyoshi<sup>6</sup> and Koichi Tsukiyama<sup>1,2</sup>

<sup>1</sup>Department of Chemistry, Faculty of Science Division I, Tokyo University of Science, 1-3 Kagurazaka, Shinjuku-ku, Tokyo 162-8601, Japan

<sup>2</sup>Research Institute for Science and Technology, Tokyo University of Science, 2641 Yamazaki, Noda, Chiba 278-8510, Japan

<sup>3</sup>Department of Physics, General Studies, College of Engineering, Nihon University, 1 Nakagawara, Tokusada, Tamuramachi, Koriyama, Fukushima 963-8642, Japan

<sup>4</sup>Department of Materials and Life Sciences, Faculty of Science and Technology, Sophia University, 7-1 Kioi-cho, Chiyoda-ku, Tokyo 102-8554, Japan

<sup>5</sup>Astronomy Data Centre, National Astronomical Observatory of Japan, 2-21-1 Osawa, Mitaka, Tokyo 181-8588, Japan

<sup>6</sup>Division of Pure and Applied Science, Graduate School of Science and Technology, Gunma University, 4-2 Aramaki, Maebashi, Gunma 371-8510, Japan

Accepted 2020 June 8. Received 2020 June 8; in original form 2020 March 19

## ABSTRACT

Molecules in diffuse and translucent clouds experience cooling as a result of radiation and less excitation from collisions. However, rotation around a molecular axis of acetonitrile,  $\text{CH}_3\text{CN}$ , cannot be cooled by radiation, causing rotational populations to concentrate at the  $J = K$  levels. We aim to search for absorption lines of  $\text{CH}_3\text{CN}$  having  $J = K$  level concentrations in diffuse and translucent clouds. The  $J_K = 4_3-3_3$  transition at 73.6 GHz was investigated toward Sgr B2(M) in the Galactic Centre region and other sources, using the Nobeyama 45-m telescope. Based on the absorption lines detected toward Sgr B2(M), a radiation temperature of  $2.8 \pm 0.5$  K, kinetic temperature of  $88 \pm 29$  K and column density of  $(1.35 \pm 0.14) \times 10^{14} \text{ cm}^{-2}$  were derived for this molecule, revealing extremely concentrated  $J = K$  levels due to the lower excitation temperature and higher kinetic temperature. The absorption lines occurred at a velocity of  $64 \text{ km s}^{-1}$ . The results confirm that  $\text{CH}_3\text{CN}$  with  $J = K$  level concentrations exists in the envelope of Sgr B2(M).

**Key words:** astrochemistry – ISM: clouds – ISM: molecules – radio lines: ISM.

## 1 INTRODUCTION

The origin of complex organic molecules (COMs) is one of the most important questions in astrochemistry and astrophysics. Naturally enough, distributions of COMs in space provide clues revealing their origin. There is no absolute definition of COM size and in this study we use the definition of  $\geq 6$  atoms (e.g. Herbst & Van Dishoeck 2009). In both the Galactic Centre and the Galactic disc, many COMs have been found in star-forming regions, such as Orion KL (e.g. White et al. 2003), the Sagittarius (Sgr) B2 cores (e.g. Belloche et al. 2013) and IRAS 16293–2422 (e.g. Jørgensen et al. 2016), and in dense clouds without signs of star formation, such as the typical Galactic Centre clouds reported by Requena-Torres et al. (2006, 2008).

Relatively small COMs, such as  $\text{CH}_3\text{OH}$ ,  $\text{CH}_3\text{CN}$ ,  $\text{CH}_3\text{CHO}$  and  $\text{NH}_2\text{CHO}$ , have been detected in translucent clouds (Thiel et al. 2017, 2019), and  $\text{CNCHO}$  with four heavy atoms was discovered in the spatially extended region toward Sgr B2(N) (Remijan et al. 2008). Conversely, in diffuse clouds, the large molecules found, *cyclic*- $\text{C}_3\text{H}_2$  (Cox, Guesten and Henkel 1988),  $\text{H}_2\text{CCC}$  (Liszt et al. 2012) and  $\text{CH}_3\text{CN}$  (Liszt et al. 2018), consist of five or six atoms, except for  $\text{C}_{60}^+$  (Campbell et al. 2015; Walker et al. 2015, 2016). Liszt et al. (2018) reported that  $\text{CH}_3\text{CN}$  is ubiquitous in the local diffuse molecular interstellar medium.

The question is whether COMs are abundant and difficult to detect in diffuse and translucent clouds, or not abundant. One potential candidate for investigating this question is the Sgr B2 region. The structural model of the Sgr B2 region reported by Hüttemeister et al. (1993, 1995) consists of three cores (N, M and S) within a moderate-density region (hereafter the moderate-density envelope in this article). The three cores, with densities  $n(\text{H}_2) \sim 10^7 \text{ cm}^{-3}$ , are embedded in the moderate-density envelope ( $n(\text{H}_2) \sim 10^5 \text{ cm}^{-3}$ ) with an extended lower density envelope ( $n(\text{H}_2) \sim 10^3 \text{ cm}^{-3}$ ) further from the cores.

Although further detection of COMs by radio observations in diffuse and translucent clouds is anticipated, the search for emission lines from COMs is difficult. This is attributed to molecules with permanent dipole moments being cooled by radiation and less frequent collisions in diffuse and translucent clouds, making emission lines difficult to detect. Therefore, the search for absorption lines is an alternative option for detecting COMs in diffuse and translucent clouds. Bright background radio continuum sources, such as the Sgr B2 region, are required to observe the absorption lines of molecules. This requirement restricts the detection of COMs in diffuse and translucent clouds further.

Several COMs detected toward Sgr B2(N) demonstrate absorption lines at a velocity of  $64 \text{ km s}^{-1}$  (Hollis et al. 2004, 2006a, 2006b; Loomis et al. 2013; Zaleski et al. 2013; McGuire et al. 2016) and  $\text{H}_2\text{COH}^+$  (Ohishi et al. 1996) and other small molecules (e.g. Hüttemeister et al. 1995) indicate absorption lines near  $64 \text{ km s}^{-1}$ . The reports suggested that almost all COMs with absorption lines

\* E-mail: araki@rs.tus.ac.jp

caused by continuum emission from the cores are located in the envelope, all having the same velocity of  $64 \text{ km s}^{-1}$ . In this study, we selected the same line of sight toward Sgr B2(M) as our main source, for two reasons: emission lines of the Sgr B2(M) core have a velocity of  $62 \text{ km s}^{-1}$ , which facilitates distinguishing absorption lines from emission lines, and Sgr B2(M) is optically thin compared with Sgr B2(N) (Belloche et al. 2013).

Absorption lines for the larger COMs would be weak, because intensities of absorption lines are almost proportional to population differences between upper and lower states of transition. Conversely, the stronger absorption lines of small COMs facilitate their detection. The smallest COM has six atoms and is considered appropriate for tracing COMs. Some well-known COM-rich clouds, such as Orion KL (e.g. White et al. 2003), IRAS 16293–2422 (e.g. Cazaux et al. 2003) and the Sgr B2 cores (e.g. Belloche et al. 2013), are rich in acetonitrile ( $\text{CH}_3\text{CN}$ ), and this molecule has a large permanent dipole moment of  $3.9220 \text{ D}$  (Gadhi et al. 1995). Hence,  $\text{CH}_3\text{CN}$  can be a possible indicator of COMs in diffuse and translucent clouds.

Molecules in interstellar space are cooled by radiation and excited by collisions with hydrogen molecules. Generally, the excitation temperatures of molecules with dipole moments result from the competition between cooling and excitation, whereas the excitation temperatures of molecules without dipole moments approximately match the kinetic temperature of hydrogen molecules in a cloud, because of the lack of radiational cooling. However, for molecules with a threefold axis of symmetry, such as  $\text{NH}_3$ ,  $\text{H}_3\text{O}^+$ ,  $\text{CH}_3\text{CN}$  and  $\text{CH}_3\text{CCH}$ , overall rotation ( $J$  rotation, where  $J$  is a quantum number of a total angular momentum) is cooled by the radiation of  $J + 1 \rightarrow J$  transitions. The rotation around its molecular axis ( $K$  rotation, where  $K$  is the projection of a total angular momentum along the molecular axis,  $K \leq J$ ) is maintained because only  $\Delta K = 0$  transitions are allowed in the emission and absorption of radio waves. Therefore, the excitation temperature of the  $K$  rotation is higher than that of the  $J$  rotation, i.e. populations are concentrated at the  $J = K$  rotational levels. The molecular axis can be regarded as a *hot axis*. In this article, we have named this concentration at the  $J = K$  rotational levels in the population of a prolate molecule the *hot axis effect* for convenience, where these levels correspond to the so-called *metastable levels* in the case of oblate small molecules such as  $\text{NH}_3$  (Walmsley & Ungerechts 1983) and  $\text{H}_3\text{O}^+$  (Lis et al. 2014). In diffuse and translucent clouds, this sub-thermal condition is obtained under a condition of less collisional excitation because of their low-density conditions. The excitation temperature of the  $K$  rotation is approximately equal to the kinetic temperature of the cloud, whereas the excitation temperature of the  $J$  rotation is close to the radiation temperature of the cloud. The concentrations of the populations in the  $J = K$  levels induce clear absorption lines of  $J + 1 \leftarrow J$  and  $\Delta K = 0$  transitions. This effect is an essential factor in evaluating accurate abundances of  $\text{CH}_3\text{CN}$  in diffuse and translucent clouds.

Candidates of such absorption lines have been reported. A spectral dip at the frequency of the  $J_K = 4_3-3_3$  transition for  $\text{CH}_3\text{CN}$  was observed toward Sgr B2 by Cummins et al. (1983), who suggested that the dip appears to be an absorption and may be produced by lower-excitation foreground material. Typical absorption lines of  $\text{CH}_3\text{CN}$  were detected in the  $J_K = 6_5-5_5$  and  $5_4-4_4$  transitions toward Sgr B2(M) by De Vicente, Martín-Pintado and Wilson (1997) and Belloche et al. (2013). These lines were explained by a hot diffuse envelope having a kinetic temperature of  $300 \text{ K}$ . If these absorption lines are the result of  $J = K$  level concentrations by the hot axis effect, the  $J$ -rotation temperature could be close to the cosmic background temperature. However, in this envelope, the  $J$ -rotation temperature

could not be determined. This is because the line profiles were very complex and the only detected absorption lines were from  $J = K$  levels (De Vicente et al. 1997). To find the  $J = K$  level concentrations from the hot axis effect, absorption lines from all  $K$  levels need to be evaluated.

The conditions of the emission component toward Sgr B2 have been derived as  $85 \pm 10$  and  $16\text{--}17 \text{ K}$  for kinetic and  $J$ -rotation temperatures, respectively (Cummins et al. 1983) and similar conditions have been found in the Orion Molecular Cloud (Hollis 1982; Andersson, Askne and Hjalmarsen 1984; Loren & Mundy 1984). However, the  $J$ -rotation temperatures reported in these articles are still higher than the cosmic background temperature. When radiational cooling is more effective,  $J$ -rotation is cooled further. As a result,  $J = K$  level concentrations are expected to appear clearly, i.e. the  $J$ -rotational temperature is measured to be approximately  $2.7 \text{ K}$ . Definite detections of these concentrations have yet to be reported.

This study aims to identify  $J = K$  level concentrations of  $\text{CH}_3\text{CN}$  by the hot axis effect through observation and analysis of absorption lines from all  $K$  levels in the Sgr B2 region. In Section 2, observations of  $\text{CH}_3\text{CN}$  and  $\text{CH}_3\text{CCH}$  using the Nobeyama 45-m telescope are described, where  $\text{CH}_3\text{CCH}$  is included to provide a kinetic temperature that can be used to analyse rotational profiles of  $\text{CH}_3\text{CN}$ . In Section 3, we report the detection of absorption lines of  $\text{CH}_3\text{CN}$  in the envelope toward Sgr B2(M).

## 2 OBSERVATIONS

The Nobeyama Radio Observatory 45-m telescope<sup>1</sup> was employed in this work. To detect  $\text{CH}_3\text{CN}$  in diffuse and translucent clouds, we searched for absorption lines mainly toward Sgr B2(M), but we also observed the quasar B0212+735 and the massive star-forming regions Orion IRC2, W49N and W51. The position-switching mode was selected for the observations. The observed clouds and their off positions are listed in Table 1. We searched in these clouds for the  $J = 4\text{--}3$  transitions of  $\text{CH}_3\text{CN}$  at  $73.6 \text{ GHz}$  according to the presumption of intensities for absorption lines in Appendix A1. Based on reported observations (Cummins et al. 1983; De Vicente et al. 1997; Belloche et al. 2013), Sgr B2(M) was expected to be the best source for detecting absorptions. In the case of Sgr B2(M), the  $J = 6\text{--}5$  transition of  $\text{CH}_3\text{CN}$  at  $110.3 \text{ GHz}$  was investigated towards the edge ( $+48 \text{ arcsec}$ ,  $-52 \text{ arcsec}$ ;  $2.7 \text{ pc}$ ) of the Sgr B2(M) core (see Table 1), to detect emission lines that do not overlap with absorption lines; this observational point has little disturbance from absorption, because of the small amount of background continuum emission. Assuming a widely uniform kinetic temperature such as with  $\text{NH}_3$  (Hüttemeister et al. 1993), observations made toward the edge will have the same kinetic temperature as an emission component toward the Sgr B2(M) core, facilitating the extraction of absorption lines from superimposed spectra.

To evaluate the kinetic temperature of an emission component directly, we observed the  $J = 5\text{--}4$  transitions of  $\text{CH}_3\text{CCH}$  at  $85.4 \text{ GHz}$  toward Sgr B2(M) (see Section 3.1), as the emission lines of these transitions would not be disturbed by the absorption lines of the envelope (Belloche et al. 2013). For comparison, we also observed the same transitions in B0212+735, Orion IRC2, W49N and W51.

For observations in the  $73.6\text{--}$  and  $85.4\text{-GHz}$  frequency regions, T70H/V dual-polarization side-band separating superconductor–

<sup>1</sup>The 45-m telescope is operated by the Nobeyama Radio Observatory, a branch of the National Astronomical Observatory of Japan.

**Table 1.** Observation positions.

|                             | RA (J2000)                                         | Dec. (J2000)   | Off position <sup>a</sup> |        | Pointing | Date                  |
|-----------------------------|----------------------------------------------------|----------------|---------------------------|--------|----------|-----------------------|
|                             |                                                    |                | RA                        | Dec.   |          |                       |
| B0212+735 <sup>b</sup>      | 2 <sup>h</sup> 17 <sup>m</sup> 30 <sup>s</sup> .8  | 73° 49′ 32.6″  | +10′23″                   | −1′33″ | TX Cam   | 2016 Mar and Apr      |
| Orion IRC2                  | 5 <sup>h</sup> 35 <sup>m</sup> 14 <sup>s</sup> .5  | −5° 22′ 29.6″  | +15′                      | +20′   | Orion KL | 2016 Mar and Apr      |
| Sgr B2(M)                   | 17 <sup>h</sup> 47 <sup>m</sup> 20 <sup>s</sup> .4 | −28° 23′ 07.3″ | +60′                      | 0′     | VX Sgr   | 2018 Jan <sup>c</sup> |
| Sgr B2(M) edge <sup>d</sup> | 17 <sup>h</sup> 47 <sup>m</sup> 24 <sup>s</sup> .0 | −28° 22′ 15.4″ | +60′                      | 0′     | VX Sgr   | 2018 Feb              |
| W49N <sup>e</sup>           | 19 <sup>h</sup> 10 <sup>m</sup> 13 <sup>s</sup> .2 | 9° 06′ 12.0″   | +14′                      | +14′   | GL 2445  | 2017 Feb <sup>f</sup> |
| W51 <sup>e</sup>            | 19 <sup>h</sup> 23 <sup>m</sup> 43 <sup>s</sup> .9 | +14° 30′ 36.4″ | +30′                      | 0′     | RR Aql   | 2017 Feb              |

<sup>a</sup>For position switching.

<sup>b</sup>Observation position is from Liszt and Pety (2012). The position without CO emission in the map was selected as the off position.

<sup>c</sup>2018 Feb for HC<sub>3</sub>N.

<sup>d</sup>Edge of Sgr B2(M), i.e. offset position from the centre of Sgr B2(M).

<sup>e</sup>Observation position is from Sonnentrucker et al. (2010).

<sup>f</sup>Including the short integrations in 2018 Jan.

**Table 2.** Beam sizes and continuum intensities  $T_C$ .

|           | Molecule (continuum) | Transition $J$ | Frequency (GHz) | Beam size (arcsec) | $\eta_B$ | Telescope   | $T_C$ (K)             |
|-----------|----------------------|----------------|-----------------|--------------------|----------|-------------|-----------------------|
| B0212+735 | continuum            |                | 80              | 18.7               | 0.58     | NRO 45 m    | 1.07(17) <sup>a</sup> |
| Sgr B2(M) | CH <sub>3</sub> CN   | 6–5            | 110.3           | 22.3               |          | IRAM 30 m   | 2.7(7) <sup>b,c</sup> |
|           | CH <sub>3</sub> CN   | 5–4            | 92.0            | 26.8               |          | IRAM 30 m   | 2.7(7) <sup>b,c</sup> |
|           | CH <sub>3</sub> CCH  | 5–4            | 85.4            | 19.1               | 0.55     | NRO 45 m    | 2.7(7) <sup>b</sup>   |
|           | continuum            |                | 80              | 18.7               | 0.58     | NRO 45 m    | 2.7(7) <sup>d</sup>   |
|           | CH <sub>3</sub> CN   | 4–3            | 73.6            | 20.4               | 0.55     | NRO 45 m    | 2.7(7) <sup>b</sup>   |
|           | HC <sub>3</sub> N    | 5–4            | 45.5            | 36.6               | 0.69     | NRO 45 m    | <14                   |
|           | SiO                  | 1–0            | 43.4            | 23                 |          | MPIFR 100 m | 14 <sup>e</sup>       |
|           | HC <sub>3</sub> N    | 4–3            | 36.4            | 27                 |          | MPIFR 100 m | 21 <sup>e</sup>       |
| W49N      | continuum            |                | 80              | 18.7               | 0.58     | NRO 45 m    | 2.80(9) <sup>a</sup>  |
| W51       | continuum            |                | 80              | 18.7               | 0.58     | NRO 45 m    | 2.78(9) <sup>a</sup>  |

*Note.* The numbers in the parentheses are the errors in units of the last significant digit.  $T_C$  does not include the cosmic background radiation (e.g. Greaves et al. 1992).

<sup>a</sup>The same value is assumed as an intensity at 73.6 GHz.

<sup>b</sup>Estimated from the observed flux density at 80.0 GHz, assuming a constant value for the flux density in this frequency region.

<sup>c</sup>This value is used to evaluate  $T_L/T_C$  from the reported spectrum by Belloche et al. (2013).

<sup>d</sup>Observed in this work.

<sup>e</sup>Hüttemeister et al. (1995).

insulator–superconductor (SIS) mixer receivers were used and the spectra obtained from different polarizations were averaged. The main beam efficiency was 0.55 in the frequency regions of both receivers. (Beam sizes are listed in Table 2.) A spectral analysis machine for the 45-m telescope (SAM45) highly flexible FX-type spectrometer (Kuno et al. 2011; Kamazaki et al. 2012) was employed for the backend. A channel separation of 61.04 kHz was selected with SAM45, giving a bandwidth of 250 MHz for each array. This channel separation corresponds to a velocity resolution of 0.50 km s<sup>−1</sup> at 73.6 GHz.

For observations in the 110.3-GHz frequency region, FOur-beam REceiver System on the 45-m Telescope (FOREST) dual-polarization side-band separating SIS mixer receivers (Minamidani et al. 2016) were utilized, where the main beam efficiency was 0.43, and the beam size was 14.6 arcsec, the average of the H and V receivers. A channel separation of 61.04 kHz was selected with SAM45, giving a bandwidth of 250 MHz for each array, corresponding to a velocity resolution of 0.33 km s<sup>−1</sup> at 110.3 GHz.

To obtain the normalized intensities of absorption spectra, the continuum intensities,  $T_C$ , toward the target sources were observed at 80 GHz using the FOREST receivers, because the T70H/V receivers do not support continuum observations. The observed intensities were calibrated using the standard source NGC 7027 with intensities of 5.5, 5.0 and 4.6 Jy at 23, 43 and 86 GHz, respectively (Tsuboi et al. 2008). NGC 7027 was observed on the same day as the observations of the 73.6- and 85.4-GHz frequency regions. For the 70–110 GHz region, it is expected that the continuum emission will be dominated by free–free emission from H II regions and will not vary much with frequency. Although the influence of dust thermal emission, which varies with frequency, increases in a higher frequency region, this can still be small in this frequency region. Thus, we use a constant value for the flux density. Because the source size of the continuum is smaller than the beam size of the present observations (Akabane et al. 1988; Liu & Snyder 1999),  $T_C$  can be constant. Hence,  $T_C$  from 73.6–110.3 GHz of Sgr B2(M) is estimated from the observed flux density at 80.0 GHz, as listed in Table 2.

Telescope pointing was verified by observing nearby SiO maser ( $\nu = 1, J = 1-0$ ) sources every 30–90 min. A typical pointing deviation was a few arcsec. The intensity scale was calibrated using the chopper wheel method.

### 3 RESULTS AND DISCUSSION

The emission lines of  $\text{CH}_3\text{CN}$  and  $\text{CH}_3\text{CCH}$  were observed toward the massive star-forming regions Orion IRc2, Sgr B2(M), W49N and W51. For  $\text{CH}_3\text{CN}$ , a superimposed spectrum of the absorption lines from the envelope and the emission lines from the core was observed toward Sgr B2(M). Extracting the absorption lines requires an estimated profile of the emission lines from the core; this, in turn, requires the kinetic temperature of the core, which can be obtained from the profile of the emission lines of  $\text{CH}_3\text{CCH}$ , as described in Section 3.1. Extracted pure absorption profiles of  $\text{CH}_3\text{CN}$ , described in Section 3.2, are used for obtaining the kinetic temperature and radiation temperature in the envelope, as well as the column density of  $\text{CH}_3\text{CN}$ , as discussed in Section 3.3.

$\text{HC}_3\text{N}$  absorption lines are analysed in Appendix A2; they were also observed, as other molecules with absorption facilitate the study of COM abundances. The abundances of  $\text{CH}_3\text{CN}$ ,  $\text{HC}_3\text{N}$  and other COMs in the various clouds are compared and discussed in Appendix A3.

#### 3.1 Emission lines of $\text{CH}_3\text{CCH}$

The profile of the emission lines of  $\text{CH}_3\text{CN}$  must be analysed using the kinetic temperature, excitation temperature of the  $J$  rotation and column density. In this study, the kinetic temperature was evaluated by a  $K$ -structure profile of the emission lines for  $\text{CH}_3\text{CCH}$  ( $\mu = 0.784$  D, Müller et al. 2001, 2005), assuming that the foreground  $\text{CH}_3\text{CCH}$  does not produce absorption lines and that both molecules exist in the same region in the dense cloud. The emission lines in the  $J = 5-4$  transition of  $\text{CH}_3\text{CCH}$  toward Sgr B2(M) are suitable for this evaluation, because the absorption lines of the envelope are not overlapped on these lines (Belloche et al. 2013). In addition, the velocity of  $\text{CH}_3\text{CCH}$ , about  $62 \text{ km s}^{-1}$ , is equal to that of typical emission lines of the Sgr B2(M) core (Belloche et al. 2013).

Prior to the analysis of the  $\text{CH}_3\text{CN}$  spectra, we analysed the spectra of  $\text{CH}_3\text{CCH}$  as illustrated in Fig. 1. Toward Orion IRc2, Sgr B2(M), W49N and W51, emission lines were detected and absorption lines were not; neither emission nor absorption lines were detected toward B0212+735. The parameters of the  $\text{CH}_3\text{CCH}$  emission lines are listed in Table 3. A column density of each  $K$ -ladder is determined conventionally (Snyder et al. 2006) by assuming the excitation temperatures,  $T_{\text{ex}}$ , listed in Table 4.  $T_{\text{ex}}$  is an excitation temperature of the  $J$  rotation, as a result of radiational cooling and excitation from collisions. The total column density is obtained by summing the column densities of  $K$  stacks for  $K = 0-4$  (Table 4). Kinetic temperatures are derived from the column densities of  $K$  stacks, assuming populations are doubled in the  $K = 3, 6, \dots$  levels. As an example, the kinetic temperature in the Sgr B2(M) core is derived as  $59 \pm 7 \text{ K}$  from comparison of the integrated intensities of the  $K$  structure,  $W$ , in Table 3. This temperature agrees with both  $70 \text{ K}$  for  $\text{CH}_3\text{CCH}$  and  $60 \text{ K}$  for  $\text{CH}_3\text{CN}$  as reported by Belloche et al. (2013) and was, therefore, used for the kinetic temperature of the  $\text{CH}_3\text{CN}$  emission component, as described in the next section.

#### 3.2 Extraction of absorption lines of $\text{CH}_3\text{CN}$ toward Sgr B2(M)

The observed spectra of  $\text{CH}_3\text{CN}$  are illustrated in Figs 2 and 3. Only emission lines were observed in the spectra toward Orion IRc2, W49N, W51 and the edge of the Sgr B2(M) core. Neither emission nor absorption lines were detected toward B0212+735. The parameters of the emission lines of  $\text{CH}_3\text{CN}$  are presented in Table 5. For Orion IRc2 and W49N, the velocities measured are not the same as those of  $\text{CH}_3\text{CCH}$ .  $\text{CH}_3\text{CN}$  and  $\text{CH}_3\text{CCH}$  would reside in different components in these clouds. Using the intensities of the emission lines, the kinetic temperatures and column densities were determined by assuming the excitation temperatures,  $T_{\text{ex}}$ , as listed in Table 4, and doubled populations of the  $K = 3, 6, \dots$  levels.

The spectra of  $\text{CH}_3\text{CN}$  toward Sgr B2(M) indicate a superimposed structure of emission and absorption lines, which must be separated. For emission lines from the Sgr B2(M) core, we assume that the kinetic temperature of  $\text{CH}_3\text{CN}$  is equal to that of  $\text{CH}_3\text{CCH}$  ( $59 \text{ K}$ , line 2 in Table 4) and that the excitation temperature of the  $J$  rotation of  $\text{CH}_3\text{CN}$  is  $16 \text{ K}$  (Cummins et al. 1983). The intensities of the emissions are determined to fit the line profile of the low-velocity side of the  $J_K = 4_0-3_0$  transition in Fig. 4(a); this is because the profile of the line is largely undisturbed by absorption lines, as the velocity and width of the absorption lines ( $64$  and  $14-15 \text{ km s}^{-1}$ ) are different from those of the emission lines ( $62 \text{ km s}^{-1}$  (Belloche et al. 2013) and approximately  $20 \text{ km s}^{-1}$ ). Fig. 4(a) also illustrates estimated emission profiles, where the column density is  $1.7 \times 10^{14} \text{ cm}^{-2}$  in the Sgr B2(M) core. The same analyses can be applied to the reported spectra of the  $J = 5-4$  and  $6-5$  transitions. Using the same parameters as in the case of  $J = 4-3$ , a line profile of the low-velocity side of the  $J_K = 5_0-4_0$  transition agrees closely with that reported by Belloche et al. (2013), as illustrated in Fig. 4(b). This is the first validation for the estimated emission-line profiles. The profile of  $J = 6-5$  (Belloche et al. 2013) is also reproduced, as illustrated in Fig. 4(c), assuming a column density 1.35 times larger and the same temperature parameters. The requirement to use a larger column density may be because the beam observing the  $J = 6-5$  transition covers only the higher density region, owing to its smaller cross-sectional area.

To evaluate the validity of the above assumption, that the kinetic temperatures of  $\text{CH}_3\text{CN}$  and  $\text{CH}_3\text{CCH}$  in the Sgr B2(M) core are equal, we investigated the kinetic temperature through the  $J = 6-5$  emission-line profile of  $\text{CH}_3\text{CN}$  at the edge of Sgr B2(M). Fortunately, this profile indicates no absorption (Fig. 3). The kinetic temperature is derived as  $72 \pm 18 \text{ K}$  (line 8 in Table 4), which is consistent with the assumption that the kinetic temperatures at the edge and the core of Sgr B2(M) are equal.

Using the estimated emission profiles and interpolating the continuum intensities (Table 2), in Fig. 4 we plotted absorption profiles with intensities,  $1+T_L/T_C$ . In this process,  $T_L$  ( $< 0$ ) is the absorption intensity of a line and  $T_C$  in the present analysis is the sum of the line emission intensity and the continuum intensity, because the emission lines also contribute to background radiation. The parameters of the absorption lines are listed in Table 6. The absorption lines of  $K = 2$  and  $3$  for the  $J = 5-4$  transition overlap with the  $\text{HC}_3\text{N}$  line for  $\nu_3 + 3 \nu_7$  and an unidentified line around  $91\,980 \text{ MHz}$ , respectively. Thus, the absorption lines of  $K = 0, 1, 2$  and  $3$  for  $J = 4-3$  and  $K = 0, 1$  and  $4$  for  $J = 5-4$  were selected to derive column density, radiation temperature and kinetic temperature using the equations in Appendix A1. This is because these lines, in which the profiles are close to Gaussian functions, are thought to be non-blending with other lines.



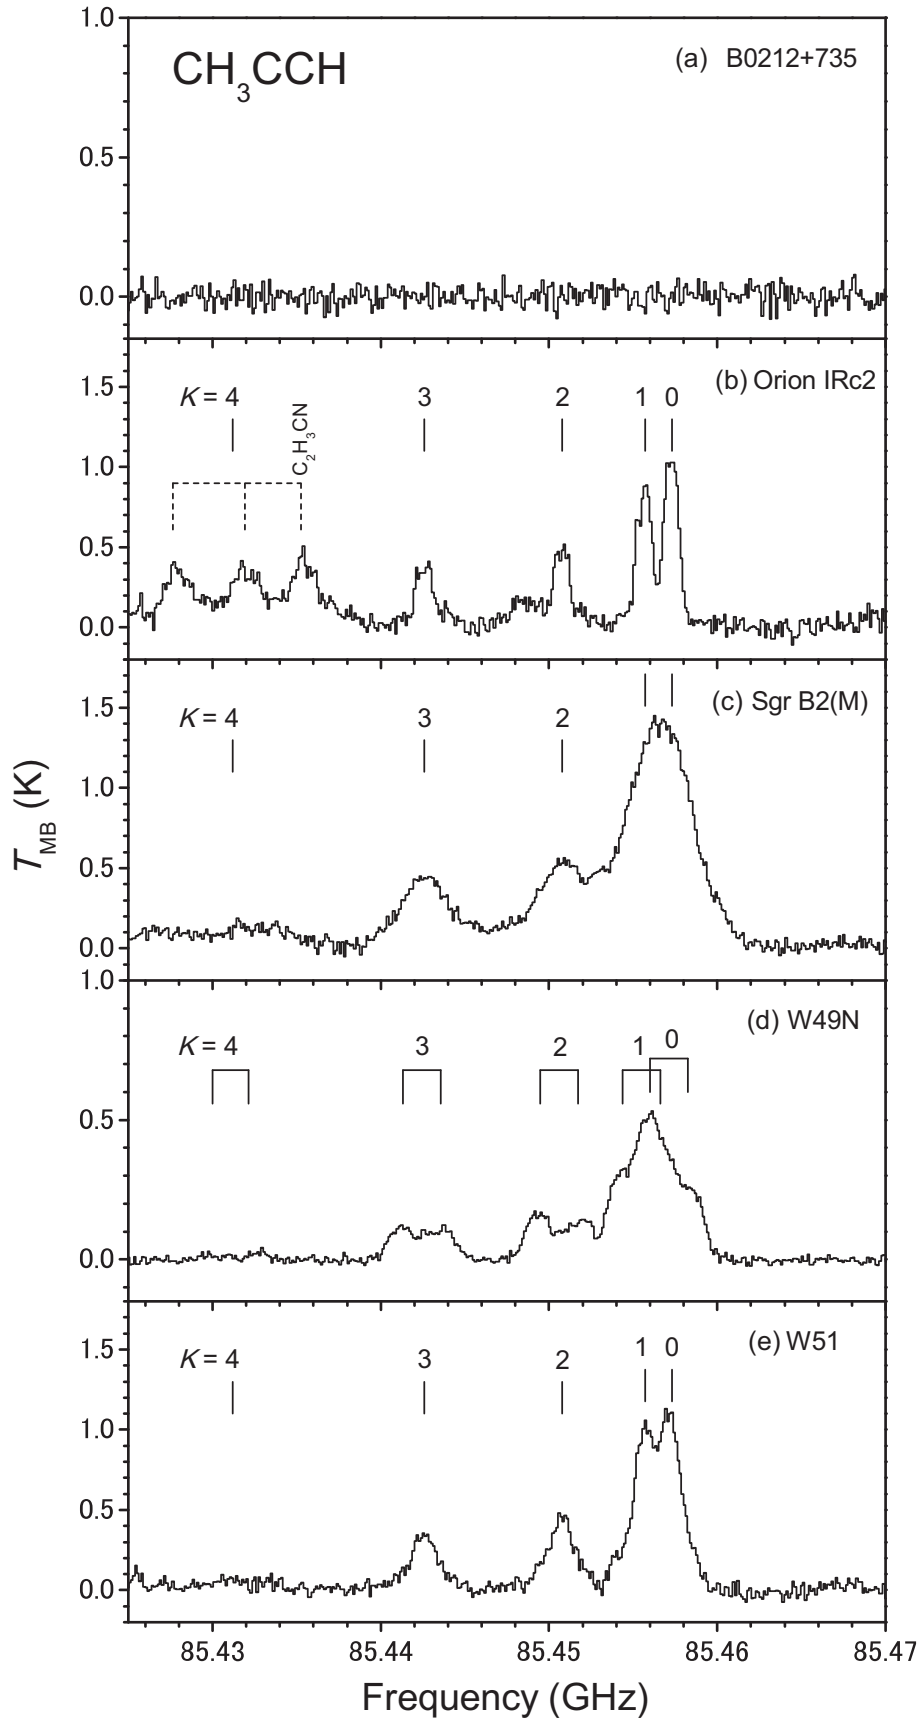

**Figure 1.** Emission lines of the  $J_K = 5_K-4_K$  rotational transitions of  $\text{CH}_3\text{CCH}$ . Velocities of 3.5, 8.7, 62.0, 7.0 and 56.4  $\text{km s}^{-1}$  are assumed in the spectra of B0212+735, Orion IRc2, Sgr B2(M), W49N and W51, respectively.

**Table 3.** Emission lines of the  $J_K = 5_K-4_K$  rotational transitions of  $\text{CH}_3\text{CCH}$ .

| Source     | Transition<br>$K$ | Frequency <sup>a,b</sup><br>(GHz) | $T_{\text{MB}}^c$<br>(K) | $\Delta v^c$<br>(km s <sup>-1</sup> ) | $W^d$<br>(K km s <sup>-1</sup> ) | $V_{\text{LSR}}$<br>(km s <sup>-1</sup> ) | rms<br>(mK) |
|------------|-------------------|-----------------------------------|--------------------------|---------------------------------------|----------------------------------|-------------------------------------------|-------------|
| B0212+735  | 0                 | 85457.300                         | <0.09                    |                                       |                                  |                                           | 31          |
|            | 1                 | 85455.667                         | <0.09                    |                                       |                                  |                                           |             |
|            | 2                 | 85450.766                         | <0.09                    |                                       |                                  |                                           |             |
|            | 3                 | 85442.601                         | <0.09                    |                                       |                                  |                                           |             |
|            | 4                 | 85431.175                         | <0.09                    |                                       |                                  |                                           |             |
| Orion IRC2 | 0                 |                                   | 1.11(8)                  | 3.5(3)                                | 4.1(5)                           | 8.7                                       | 36          |
|            | 1                 |                                   | 0.88(8)                  | 3.7(5)                                | 3.5(5)                           | 8.7                                       |             |
|            | 2                 |                                   | 0.53(7)                  | 3.7                                   | 2.1(3)                           | 8.7                                       |             |
|            | 3                 |                                   | 0.42(7)                  | 3.7                                   | 1.7(3)                           | 8.6                                       |             |
| SgrB2 (M)  | 0                 |                                   | 0.97(46)                 | 13.2                                  | 13.7(65) <sup>e</sup>            | 61.6                                      | 25          |
|            | 1                 |                                   | 0.70(44)                 | 13.2                                  | 9.9(62) <sup>e</sup>             | 62.7                                      |             |
|            | 2                 |                                   | 0.52(6)                  | 13.2                                  | 7.3(9)                           | 62.1                                      |             |
|            | 3                 |                                   | 0.43(5)                  | 13.2                                  | 6.1(8)                           | 61.4                                      |             |
| W49N       | 0                 |                                   | 0.251(4)                 | 6.6                                   | 1.77(3)                          | 3.6                                       | 10          |
|            | 1                 |                                   | 0.167(9)                 | 6.6                                   | 1.17(6)                          | 3.6                                       |             |
|            | 2                 |                                   | 0.132(4)                 | 6.6                                   | 0.93(3)                          | 3.6                                       |             |
|            | 3                 |                                   | 0.120(4)                 | 5.8 <sup>d</sup>                      | 0.74(3)                          | 3.6                                       |             |
|            | 4                 |                                   | 0.022(4)                 | 5.8 <sup>d</sup>                      | 0.13(3)                          | 3.6                                       |             |
| W51        | 0                 |                                   | 0.350(9)                 | 6.6                                   | 2.46(6)                          | 11.5                                      | 10          |
|            | 1                 |                                   | 0.283(4)                 | 6.6                                   | 1.99(3)                          | 11.5                                      |             |
|            | 2                 |                                   | 0.158(4)                 | 6.6                                   | 1.11(3)                          | 11.5                                      |             |
|            | 3                 |                                   | 0.124(4)                 | 5.8 <sup>d</sup>                      | 0.76(3)                          | 11.5                                      |             |
|            | 4                 |                                   | 0.014(4)                 | 5.8 <sup>d</sup>                      | 0.09(3)                          | 11.5                                      |             |
| W51        | 0                 |                                   | 0.92(5)                  | 6.0(3)                                | 5.8(4)                           | 56.3                                      | 29          |
|            | 1                 |                                   | 0.88(4)                  | 6.7(4)                                | 6.3(4)                           | 56.5                                      |             |
|            | 2                 |                                   | 0.418(14)                | 7.5(3)                                | 3.34(17)                         | 56.5                                      |             |
|            | 3                 |                                   | 0.328(14)                | 7.4(3)                                | 2.57(17)                         | 56.4                                      |             |

Note. The numbers in the parentheses are the  $1\sigma$  errors in units of the last significant digit.

<sup>a</sup>Rest frequency, which is common in all clouds.

<sup>b</sup>The Cologne Database for Molecular Spectroscopy (Müller et al. 2001, 2005).

<sup>c</sup>The main beam temperature  $T_{\text{MB}}$  and full width at half-maximum (FWHM) are obtained by a Gaussian fit. A value having no error is fixed in the fit.

<sup>d</sup> $W = \int T_{\text{MB}} dv$ .

<sup>e</sup>Large uncertainties are due to the blending of the two transitions. Sums of the integrated intensities of both lines have small uncertainties.

<sup>d</sup>Narrower widths are good for fitting.

### 3.3 Analysis of the absorption lines of $\text{CH}_3\text{CN}$ toward Sgr B2(M)

The absorption lines of  $\text{CH}_3\text{CN}$  were analysed based on a theory considering radiational cooling and excitation from collisions for rotational distributions, described in Appendix A1. This method was proposed by Oka et al. (2013) and was modified to analyse non-linear molecules by Araki, Niwayama and Tsukiyama (2014). First, it is necessary to estimate a rate for the collision-induced rotational transition,  $C$ , between  $\text{CH}_3\text{CN}$  and  $\text{H}_2$  using an initial presumption of the kinetic temperature  $T_k$ . Collisions of He, H and electrons with  $\text{CH}_3\text{CN}$  were not considered because the contribution of  $\text{H}_2$  is dominant in a molecular cloud region. The value of  $C$  is estimated using a hard-sphere collisional model, depending on  $\text{H}_2$  densities and the  $T_k$  of the cloud, as detailed in Table 7, where no  $J$  and  $K$  dependence is assumed. Since the dependence of  $C$  on  $T_k$  is weak compared with that on  $\text{H}_2$  densities, three presumed values for kinetic temperature, (a) 10 K, (b) 100 K and (c) 300 K, can support all cases of regions that include  $\text{CH}_3\text{CN}$ . Additionally, an approximate estimation of  $T_k$  is sufficient to estimate  $C$ . An approximate value of  $T_k$  can be estimated by comparing the intensities of an absorption

line from a  $J = K$  level and a blended absorption peak of  $K = 0$  and 1. In case (c),  $T_k \geq 200$  K, the lines from  $J = K$  (i.e.  $J_K = 4_3-3_3$  and  $J_K = 5_4-4_4$ ) are stronger than the blended peak of  $K = 0$  and 1. This is not the case at present. Case (a) would apply to starless dark clouds: 10 K is too low to be the temperature of the Sgr B2 region. Thus, in Table 7 we select case (b), 100 K, as an approximate estimate of  $T_k$  to derive a suitable  $C$  value.

The radiation temperature,  $T_r$ , and  $C$  are strongly correlated (see equation A1 in Appendix A1). In other words, as  $C$  increases, it produces an effect similar to the increase of  $T_r$  for rotational distributions, and either  $T_r$  or  $C$  can be determined from the relationship  $T_L/T_C$  between the  $J = 5-4$  and  $4-3$  transitions by fixing the other parameters. If  $C = 1.4 \times 10^{-6} \text{ s}^{-1}$ ,  $T_r$  is calculated as 2.7 K, which equals the cosmic background radiation. Thus, the value of  $C$  must be  $\leq 1.4 \times 10^{-6} \text{ s}^{-1}$  because  $T_r \geq 2.7$  K. Where  $T_k = 100$  K,  $C$  has values of  $1 \times 10^{-7}$  and  $1 \times 10^{-6}$ , with  $\text{H}_2$  densities of  $10^2$  and  $10^3 \text{ cm}^{-3}$ , respectively (see Table 7). However, an  $\text{H}_2$  density of  $10^2 \text{ cm}^{-3}$  is not suitable in the Sgr B2 region, since the densities of the envelopes were suggested to be  $10^3-10^5 \text{ cm}^{-3}$  by Hüttemeister et al. (1993, 1995). This suggests a value of  $C = 1 \times 10^{-6} \text{ s}^{-1}$  for the present analysis.

**Table 4.** Temperatures and column densities of the observed species.

| Species             |            | Source                        | Kinetic temperature<br>$T_k$ (K) | Temperature <sup>a</sup><br>$T_{\text{ex}}$ or $T_r$ (K) | Column density<br>$N$ (cm <sup>-2</sup> ) |
|---------------------|------------|-------------------------------|----------------------------------|----------------------------------------------------------|-------------------------------------------|
| CH <sub>3</sub> CCH | emission   | Orion IRC2                    | 50.5(5)                          | 24 <sup>b</sup>                                          | 8.10(6) × 10 <sup>14</sup>                |
|                     |            | Sgr B2(M)                     | 59(7)                            | 30 <sup>b</sup>                                          | 2.36(16) × 10 <sup>15</sup>               |
|                     |            | W49N 3.5 km s <sup>-1</sup>   | 68(7)                            | 31 <sup>c</sup>                                          | 1.70(16) × 10 <sup>14</sup>               |
|                     |            | W49N 11.5 km s <sup>-1</sup>  | 45.1(10)                         | 31 <sup>c</sup>                                          | 2.23(7) × 10 <sup>14</sup>                |
|                     |            | W51                           | 48(6)                            | 20 <sup>d</sup>                                          | 1.19(10) × 10 <sup>15</sup>               |
| CH <sub>3</sub> CN  | emission   | Orion IRC2 <sup>e</sup>       | 270(170)                         | 32.4 <sup>f</sup>                                        | 1.14(11) × 10 <sup>15</sup>               |
|                     |            | Sgr B2(M)                     | 59 <sup>g</sup>                  | 16 <sup>h</sup>                                          | 1.7 × 10 <sup>14</sup>                    |
|                     |            | Sgr B2(M) edge <sup>i</sup>   | 72(18)                           | 16 <sup>h</sup>                                          | 7.1(15) × 10 <sup>13</sup>                |
|                     |            | W49N                          | 68(14)                           | 31 <sup>c</sup>                                          | 3.3(4) × 10 <sup>13</sup>                 |
|                     |            | W51                           | 122(35)                          | 12 <sup>j</sup>                                          | 1.35(11) × 10 <sup>14</sup>               |
|                     | absorption | toward B0212+735 <sup>k</sup> | 100 <sup>l</sup>                 | 2.7 <sup>l</sup>                                         | <4 × 10 <sup>13</sup>                     |
|                     |            | toward Sgr B2(M) <sup>m</sup> | 88(29)                           | 2.8(5) <sup>n</sup>                                      | 1.35(14) × 10 <sup>14</sup>               |
|                     |            | toward W49N <sup>k</sup>      | 100 <sup>l</sup>                 | 2.7 <sup>l</sup>                                         | <7 × 10 <sup>12</sup>                     |
|                     |            | toward W51 <sup>k</sup>       | 100 <sup>l</sup>                 | 2.7 <sup>l</sup>                                         | <2 × 10 <sup>13</sup>                     |

Note. The numbers in parentheses are the 1 $\sigma$  errors in units of the last significant digit.

<sup>a</sup>An excitation temperature,  $T_{\text{ex}}$ , in the case of emission and radiation temperature,  $T_r$ , in the case of absorption.

<sup>b</sup>Fixed at the temperature reported by Churchwell and Hollis (1983).

<sup>c</sup>Fixed at the temperature of CH<sub>3</sub>CCH (Nagy et al. 2015).

<sup>d</sup>Fixed at the temperature of O<sup>13</sup>CS (Kalenskii & Johansson 2010).

<sup>e</sup>The  $K = 0$  line was not in the fitting. Single-component analysis is not appropriate.

<sup>f</sup>Fixed at the temperature of HC<sub>3</sub>N (Turner 1991).

<sup>g</sup>Fixed at the temperature of CH<sub>3</sub>CCH in Sgr B2(M) in this work.

<sup>h</sup>Fixed at the temperature of CH<sub>3</sub>CN (Cummins et al. 1983).

<sup>i</sup>Side position of Sgr B2(M). The column density is the sum of  $K$ -ladders,  $K = 0-5$ .

<sup>j</sup>Fixed at the temperature of HC<sup>13</sup>CCN (Kalenskii & Johansson 2010).

<sup>k</sup>A rate for collision-induced rotational transitions of 10<sup>-7</sup> s<sup>-1</sup> is used, based on the assumption of a diffuse cloud.

<sup>l</sup>Fixed.

<sup>m</sup>64 km s<sup>-1</sup> component. A rate for collision-induced rotational transitions of 10<sup>-6</sup> s<sup>-1</sup> is assumed (see Section 3.3).

<sup>n</sup> $T_{\text{ex}}$  between the  $J_K = 4_3$  and  $3_3$  levels, estimated to be 3.0 K.

The column density of  $(1.35 \pm 0.14) \times 10^{14}$  cm<sup>-2</sup>, radiation temperature of  $T_r = 2.8 \pm 0.5$  K and kinetic temperature of  $T_k = 88 \pm 29$  K are derived as optimum values to reproduce the observed  $T_L/T_C$  by least-squares fitting, using Equations (A1), (A2), (A3) and (A4), where the errors come from the inconsistency in the intensities of the analysed absorption lines. This inconsistency would be from imperfections of the assumed cloud structure and the observational uncertainties of  $T_L/T_C$  due to weather conditions, intensity calibration and pointing.

The uncertainty in  $T_C$  is thought to come from bias due to the influence of dust thermal emission, even though it is small. The observed flux density of Sgr B2(M) at 230.6 GHz was reported to be 44 Jy by Goldsmith et al. (1990). If  $T_C$  suffers this bias, the continuum intensities from 73.6–110.3 GHz of Sgr B2(M) may be estimated from the observed values at 80.0 and 230.6 GHz, assuming a linear relationship between  $\log_{10} \nu$  and  $\log_{10} F_\nu$ , where  $\nu$  is the frequency and  $F_\nu$  is the flux. In this case,  $T_C$  increases by +0.1 K at 73.6 GHz ( $J = 4-3$ ) and -0.1 K at 92.0 GHz ( $J = 5-4$ ) and then  $T_k$  and  $T_r$  vary by 8 and 5 per cent, respectively. On the other hand, the column density varies by -3 per cent if  $T_C$  in a whole frequency region changes uniformly by +0.1 K.

The influence of the value of  $C$  on the results is also examined. Even though  $C$  is assumed to be half of that used in the above analysis (i.e.  $C_{\text{half}} = 0.5 \times 10^{-6}$  s<sup>-1</sup>), the column density,  $T_k$  and  $T_r$  are merely increased by 0.5, -3 and 3 per cent, respectively. Thus, under the restriction of  $C \leq 2 \times 10^{-6}$  s<sup>-1</sup> because of  $T_r \geq 2.7$  K, an uncertainty in  $C$  does not have a large influence on the results.

At this temperature, an extremely low  $T_{\text{ex}}$  is estimated, e.g. 3.0 K, which is between the  $J_K = 4_3$  and  $3_3$  levels. The extracted absorption profiles of  $J = 4-3$  and  $5-4$  are reproduced by using the three derived parameters, depicted as blue lines in the lower panels in Fig. 4. The kinetic temperature of  $T_k = 88 \pm 29$  K is obtained from relative intensities of the  $K$  structure and agrees with the initial estimate of  $T_k = 100$  K used for estimating the  $C$  value.

The line width of the emission component (approximately 20 km s<sup>-1</sup>) is wider than that of the absorption component (12–15 km s<sup>-1</sup>) and velocities of both the components are not the same (Tables 5 and 6). If  $T_k$  of the emission component is over- or underestimated, the extracted absorption curves of the  $K = 2$  and 3 lines for the  $J = 4-3$  transition cannot be reproduced. This is not the case at present (Fig. 4). Following the first validation in Section 3.2, the absorption curves reproduced are the second validation of the estimated emission profiles. Thus, an assumption of  $T_k = 59$  K for the emission component of CH<sub>3</sub>CN can be suitable. Even if  $T_k$  of the emission component is varied, the radiation temperature of the absorption component is almost never changed, since this is derived from relative intensities between  $J = 4-3$  and  $5-4$ .

The relative populations of individual rotational levels of CH<sub>3</sub>CN in this temperature condition are displayed in Fig. 5. As a result, approximately 45 per cent of this molecule belongs to the  $J = K$  levels, at which rotations are restricted to being around the molecular axis. For example, in the case of the  $K = 3$  stack, the  $J = 3$  level has a much higher population compared with the  $J = 4$  levels (Fig. 5), whereas energies of both levels come close to each other ( $E_{J=3} = 48.4$  cm<sup>-1</sup> and  $E_{J=4} = 50.8$  cm<sup>-1</sup>). It is important to note

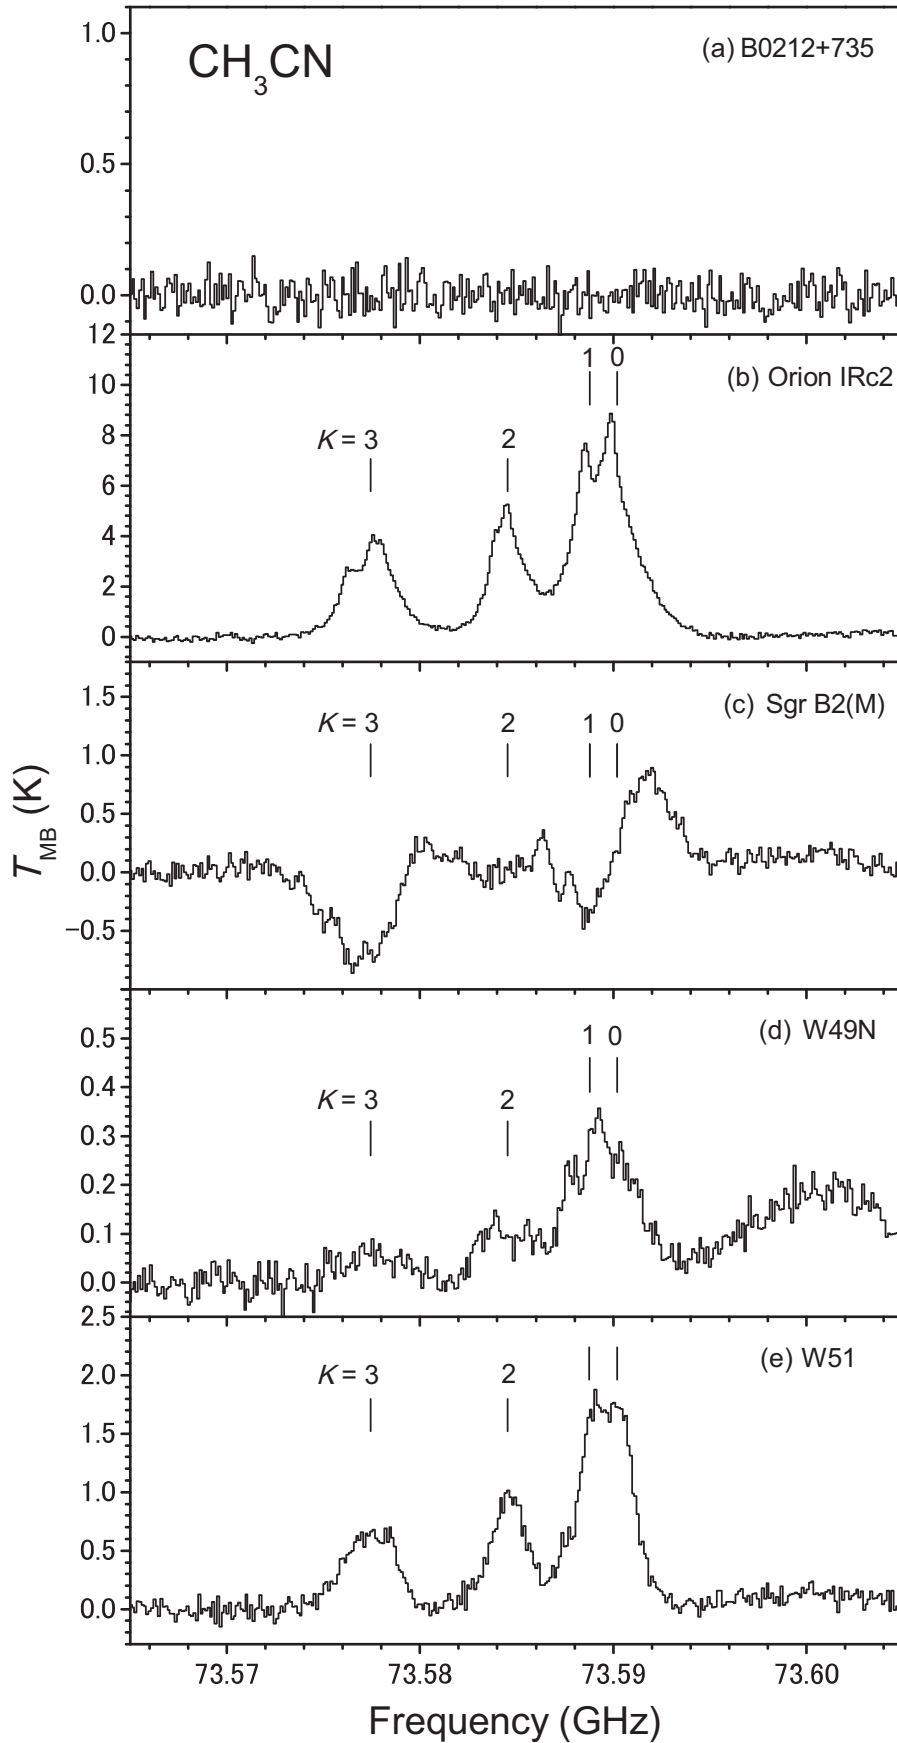

**Figure 2.** Lines of the  $J_K = 4_K - 3_K$  rotational transitions of  $\text{CH}_3\text{CN}$ . The velocities of 3.5, 6.6, 62.0, 8.0 and 56.6 are assumed in the spectra of B0212+735, Orion IRc2, Sgr B2(M), W49N and W51, respectively. A recombination line  $\text{H}63\gamma$  exists at 73.60 GHz (Lilley & Palmer 1968).



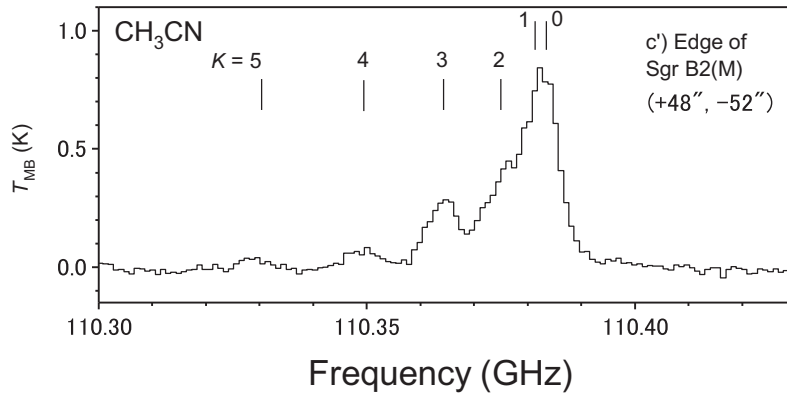

**Figure 3.** Emission lines of the  $J_K = 6_K-5_K$  rotational transitions of  $\text{CH}_3\text{CN}$  toward the edge of Sgr B2(M). A velocity of  $62.0 \text{ km s}^{-1}$  is assumed.

**Table 5.** Emission lines of  $\text{CH}_3\text{CN}$ .

| Transition<br>$J$ | Source                     | Transition<br>$K$      | Frequency <sup>a,b</sup><br>(GHz) | $T_{\text{MB}}$<br>(K) | $\Delta v^c$<br>( $\text{km s}^{-1}$ ) | $W^d$<br>( $\text{K km s}^{-1}$ ) | $V_{\text{LSR}}$<br>( $\text{km s}^{-1}$ ) | rms<br>(mK) |
|-------------------|----------------------------|------------------------|-----------------------------------|------------------------|----------------------------------------|-----------------------------------|--------------------------------------------|-------------|
| 4–3               | B0212+735                  | 0                      | 73590.219                         | <0.17                  |                                        |                                   |                                            | 56          |
|                   |                            | 1                      | 73588.800                         | <0.17                  |                                        |                                   |                                            |             |
|                   |                            | 2                      | 73584.543                         | <0.17                  |                                        |                                   |                                            |             |
|                   |                            | 3                      | 73577.452                         | <0.17                  |                                        |                                   |                                            |             |
|                   | Orion IRc2                 | 0                      |                                   | 5.77(14) <sup>e</sup>  | 8.6                                    | 53.0(12)                          | 6.1                                        | 78          |
|                   |                            | 1                      |                                   | 5.93(13)               | 8.6                                    | 54.5(12)                          | 7.5                                        |             |
|                   |                            | 2                      |                                   | 4.52(9)                | 9.9(2)                                 | 47.6(14)                          | 6.5                                        |             |
|                   |                            | 3                      |                                   | 3.53(8)                | 12.5(3)                                | 46.8(16)                          | 6.4                                        |             |
|                   | Sgr B2(M) <sup>f</sup>     | 0                      |                                   | 0.950                  | 19.8                                   | 20.1                              | 62                                         | 62          |
|                   |                            | 1                      |                                   | 0.811                  | 19.8                                   | 17.1                              | 62                                         |             |
|                   |                            | 2                      |                                   | 0.461                  | 21.1 <sup>g</sup>                      | 10.3                              | 62                                         |             |
|                   |                            | 3                      | 73577.948 <sup>h</sup>            | 0.228                  | 21.1 <sup>g</sup>                      | 5.1                               | 62                                         |             |
| 3                 |                            | 73576.501 <sup>i</sup> | 0.117                             | 19.8                   | 2.5                                    | 62                                |                                            |             |
| W49N              | 0                          |                        | 0.221(10)                         | 9.6                    | 2.26(11)                               | 6.7                               | 24                                         |             |
|                   | 1                          |                        | 0.250(10)                         | 9.6                    | 2.56(11)                               | 9.3                               |                                            |             |
|                   | 2                          |                        | 0.121(6)                          | 11.5                   | 1.49(7)                                | 8.6                               |                                            |             |
|                   | 3                          |                        | 0.060(6)                          | 15(2)                  | 1.0(2)                                 | 7.3                               |                                            |             |
| W51               | 0                          |                        | 1.37(7)                           | 9.6                    | 14.0(7)                                | 56.5                              | 66                                         |             |
|                   | 1                          |                        | 1.02(7)                           | 9.6                    | 10.4(7)                                | 56.9                              |                                            |             |
|                   | 2                          |                        | 0.94(2)                           | 9.5(3)                 | 9.5(3)                                 | 56.3                              |                                            |             |
|                   | 3                          |                        | 0.67(2)                           | 12.8(4)                | 9.2(4)                                 | 56.7                              |                                            |             |
| 6–5               | Sgr B2(M)<br>Side position | 0                      | 110383.500                        | 0.59(2)                | 19                                     | 12.0(4)                           | 62                                         | 13          |
|                   |                            | 1                      | 110381.372                        | 0.26(2)                | 19                                     | 5.4(4)                            | 62                                         |             |
|                   |                            | 2                      | 110374.989                        | 0.361(10)              | 19                                     | 7.4(2)                            | 62                                         |             |
|                   |                            | 3                      | 110364.354                        | 0.282(9)               | 21(1)                                  | 6.3(3)                            | 62                                         |             |
|                   |                            | 4                      | 110349.471                        | 0.077(10)              | 20(3)                                  | 1.7(3)                            | 62                                         |             |
|                   |                            | 5                      | 110330.345                        | 0.037(10)              | 18(6)                                  | 0.7(3)                            | 62                                         |             |

*Note.* The numbers in parentheses are the  $1\sigma$  errors in units of the last significant digit.

<sup>a</sup>Rest frequency, which is common in all clouds. Average of hyperfine components.

<sup>b</sup>The Cologne Database for Molecular Spectroscopy (Müller et al. 2001, 2005) and the article of Boucher et al. (1980).

<sup>c</sup>FWHM obtained by Gaussian fit. A value having no error is fixed in the fit.

<sup>d</sup> $W = \int T_{\text{MB}} dv$ .

<sup>e</sup>The  $K = 0$  line was not in the fitting. Single-component analysis is not appropriate because of the broad width.

<sup>f</sup>Estimated intensities. See Section 3.2.

<sup>g</sup>A large width is assumed because of the hyperfine components.

<sup>h</sup> $F = 5-4$  and  $3-2$ .

<sup>i</sup> $F = 4-3$ .

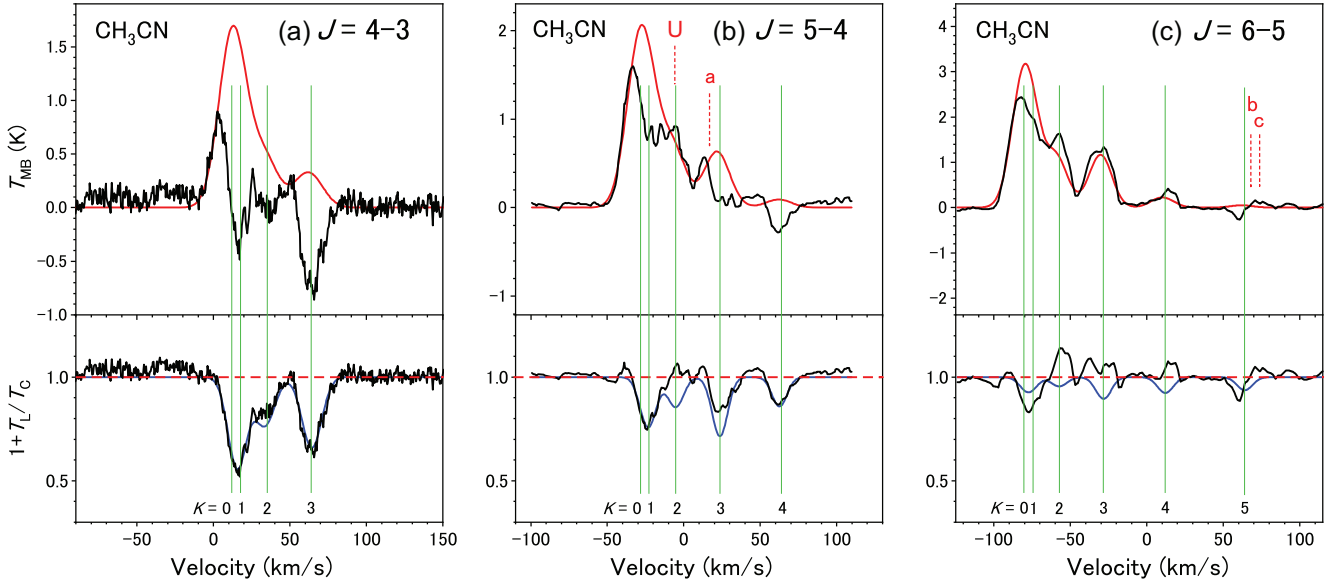

**Figure 4.** Absorption lines (black lines including noise in lower panels) obtained by subtraction of emission lines of CH<sub>3</sub>CN toward Sgr B2(M). In the upper panels, the estimated emission profiles are depicted in red (smooth lines) and the observed profiles are in black (lines including noise). The velocities are determined based on the frequencies of the  $J_K = 4_3-3_3$ ,  $5_4-4_4$  and  $6_5-5_5$  transitions, i.e. the transitions from the  $J = K$  levels, in (a), (b) and (c), respectively. The spectra of the  $J = 5-4$  and  $6-5$  transitions are from Belloche et al. (2013) by permission of ESO. The red (dotted) bar marked by ‘a’ in the middle trace shows a line of the  $J = 5-4$  transitions of HC<sub>3</sub>N  $\nu_5 + 3\nu_7$ , and those marked by ‘b’ and ‘c’ in the right trace show lines of the  $J_K = 5_0-4_0$  and  $5_1-4_1$  transitions of CH<sub>3</sub><sup>13</sup>CN (CDMS). An unidentified line marked by ‘U’ may exist at around 91 980 MHz, overlapping with  $J_K = 5_2-4_2$ . These lines cancel the absorption features of CH<sub>3</sub>CN. In the lower panels, the blue lines (smooth lines) are absorption profiles, reproduced using the derived temperatures and column density through least-squares fitting of the extracted absorption lines. Absorption profiles of the  $J = 6-5$  transitions are thought to be disturbed by some emission lines.

**Table 6.** Absorption lines of CH<sub>3</sub>CN.

| Line of sight | $J$ | $K$                  | $V_{\text{LSR}}$<br>(km s <sup>-1</sup> ) | $ T_L/T_C ^a$ | $\Delta v^b$<br>(km s <sup>-1</sup> ) | rms<br>(mK) |
|---------------|-----|----------------------|-------------------------------------------|---------------|---------------------------------------|-------------|
| B0212+735     | 4-3 | 3                    | –                                         | <0.155        | –                                     | 56          |
| Sgr B2(M)     | 4-3 | 0 & 1 <sup>c</sup>   | –                                         | 0.457(8)      | 14.4(5)                               | 62          |
|               |     | 2                    | 62.5(6)                                   | 0.176(7)      | 15.3(13)                              |             |
|               |     | 3                    | 64.34(15)                                 | 0.363(7)      | 15.1(4)                               |             |
|               | 5-4 | 0 & 1 <sup>c</sup>   | –                                         | 0.245(9)      | 12.4(5)                               | 18          |
|               |     | 2 <sup>d</sup>       | –                                         | –             | –                                     |             |
|               |     | 3                    | 65.2(3)                                   | 0.169(8)      | 12.0(7)                               |             |
|               |     | 4                    | 62.6(3)                                   | 0.136(9)      | 11.5(8)                               |             |
|               | 6-5 | 0 and 1 <sup>c</sup> | –                                         | 0.168(15)     | 11.7(11)                              | 22          |
| W49N          | 4-3 | 3                    | –                                         | <0.026        | –                                     | 24          |
| W51           | 4-3 | 3                    | –                                         | <0.072        | –                                     | 66          |

*Note.* The upper limits of  $|T_L/T_C|$  for Orion IRc2 and the side position of Sgr B2(M) cannot be estimated because suitable data of continuum intensities are not available. The numbers in parentheses are the  $1\sigma$  errors in units of the last significant digit.

<sup>a</sup>Three times the rms was assumed as an upper limit of detection.

<sup>b</sup>FWHM obtained by the Gaussian fit.

<sup>c</sup>Blend.

<sup>d</sup>A U-line may exist at around 91 980 MHz.

that, if this molecule simply follows a Boltzmann distribution, the  $J = K$  levels acquire only 2 per cent of the total population at 88 K. These abundant populations of  $J = K$  levels create relatively strong absorption lines from the  $J_K = 3_3$ ,  $4_4$  and  $5_5$  levels, according to the hot axis effect.

Since the kinetic temperatures of the moderate-density and low-density envelopes were suggested to be approximately 100 and  $> 200$  K, respectively (Hüttemeister et al. 1993, 1995), the kinetic temperature of  $T_k = 88 \pm 29$  K ensures that the  $64 \text{ km s}^{-1}$  component that includes CH<sub>3</sub>CN is in the envelope, not in a dense region of the Sgr B2(M) core with kinetic tem-

perature of  $59 \pm 7$  K (Section 3.1). As a result, our observations suggest that a significant number of CH<sub>3</sub>CN molecules with  $J = K$  level concentrations exist in the envelope of Sgr B2.

The extremely low  $T_{\text{ex}}$  (3.0 K between the  $J_K = 4_3$  and  $3_3$  levels) of CH<sub>3</sub>CN suggests a contribution of the low-density envelope to the  $64 \text{ km s}^{-1}$  component. However, further data must be collected to answer the questions about the actual distance between the  $64 \text{ km s}^{-1}$  component and the Sgr B2(M) core. In addition, it is still uncertain whether the  $64 \text{ km s}^{-1}$  component belongs to the moderate-density envelope or the low-density envelope. The

**Table 7.** Rates for collision-induced rotational transitions in s<sup>-1</sup> between CH<sub>3</sub>CN and H<sub>2</sub>

| H <sub>2</sub> density<br>cm <sup>-3</sup> | Kinetic temperature    |                      |                      |
|--------------------------------------------|------------------------|----------------------|----------------------|
|                                            | 300 K                  | 100 K                | 10 K                 |
| 10 <sup>2</sup>                            | 1.5 × 10 <sup>-7</sup> | 1 × 10 <sup>-7</sup> | 3 × 10 <sup>-8</sup> |
| 10 <sup>3</sup>                            | 1.5 × 10 <sup>-6</sup> | 1 × 10 <sup>-6</sup> | 3 × 10 <sup>-7</sup> |
| 10 <sup>5</sup>                            | 1.5 × 10 <sup>-4</sup> | 1 × 10 <sup>-4</sup> | 3 × 10 <sup>-5</sup> |
| 10 <sup>7</sup>                            | 1.5 × 10 <sup>-2</sup> | 1 × 10 <sup>-2</sup> | 3 × 10 <sup>-3</sup> |

*Note.* Rates for collision-induced rotational transitions between CH<sub>3</sub>CN and H<sub>2</sub> at room temperature at a pressure of 3–5 mTorr were obtained experimentally with errors of 6 per cent by Mäder, Bomsdorf & Andresen (1979). These rates are suitable for deriving rates for the low- $J$  rotational transitions observed in this work, because these rates were measured by using the  $J = 1-0$  and  $2-1$  rotational transitions. To estimate rates in space conditions, a hard-sphere collisional model is used. The H<sub>2</sub> densities of 10<sup>2</sup>, 10<sup>3</sup>, 10<sup>5</sup> and 10<sup>7</sup> cm<sup>-3</sup> may correspond to a typical diffuse cloud, low-density envelope, moderate-density envelope and the Sgr B2(M) core, respectively. Green (1986) derived the theoretical collision rates between CH<sub>3</sub>CN and H<sub>2</sub> as listed in Leiden Atomic and Molecular Database (2020) (Schöier et al. 2005). These theoretical rates were reported to be in accord with the values of room-temperature measurements (Mäder et al. 1979) and agree with our rates within one order of magnitude at 100 K. The assumed rate in the present analysis is discussed in Section 3.3.

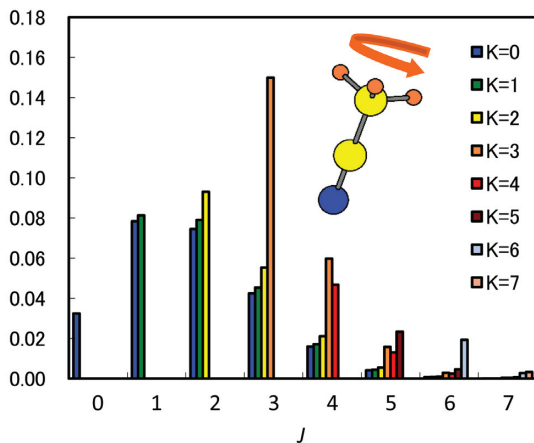

**Figure 5.** Relative populations of individual rotational levels by the *hot axis effect* (Appendix A1).  $T_k = 88$ ,  $T_r = 2.8$  K and  $C = 1 \times 10^{-6}$  s<sup>-1</sup> (Section 3.3). The summation of all populations is 1. Appendix A1 explains how to derive these populations. The illustration on the upper right shows a schematic image of rotation at the  $J = K$  levels of CH<sub>3</sub>CN.

present result does not contradict the suggestions that the 64 km s<sup>-1</sup> component is located close to the Sgr B2(M) core (Corby et al. 2015).

Pols et al. (2018) reported a 44 km s<sup>-1</sup> component toward Sgr B2(M) using the transitions  $J = 12-11$  to  $14-13$  of CH<sub>3</sub>CN, attributing it to the spatially extended part of the envelope. Generally, higher rotational levels can be excited only in a high-temperature region. The rotational levels of this component reported by Pols et al. (2018) are higher than those in the present study, and their 44 km s<sup>-1</sup> component was not observed for the transitions  $J = 4-3$  to  $6-5$ , as illustrated in Fig. 4. Hence, we infer that the 44 km s<sup>-1</sup> component differs from the 64 km s<sup>-1</sup> component observed in this study. The temperature of the 44 km s<sup>-1</sup> component is higher than that of the 64 km s<sup>-1</sup> component. The observations of higher transitions by Pols et al. (2018) are thought to detect the 44 km s<sup>-1</sup>

component selectively. Although the 44 km s<sup>-1</sup> component might generate relatively strong absorption lines from the  $J = K$  levels by the hot axis effect, Pols et al. (2018) did not present the lines in their figures and the lines are out of the range of their analysis.

#### 4 SUMMARY

To detect the  $J = K$  level concentration of CH<sub>3</sub>CN in diffuse and translucent clouds, we observed absorption lines from  $J = 4-3$  transitions at 73.6 GHz toward Sgr B2(M) using the Nobeyama Radio Observatory 45-m telescope. Both emission and absorption lines were found. By estimating the intensities of the emission lines from the Sgr B2(M) core, the absorption profiles from the envelope in the Sgr B2 region were extracted. A radiation temperature of  $2.8 \pm 0.5$  K, kinetic temperature of  $88 \pm 29$  K and column density of  $(1.35 \pm 0.14) \times 10^{14}$  cm<sup>-2</sup> were derived for this molecule and a low excitation temperature of 3.0 K was estimated between the  $J_K = 4_3$  and  $3_3$  levels. This suggests a hot axis effect, i.e. the  $J = K$  level concentrations are caused by radiational cooling and excitation from collisions. The results confirm the existence of a significant number of CH<sub>3</sub>CN molecules concentrated in the  $J = K$  levels in the relatively low-density region.

#### ACKNOWLEDGEMENTS

We thank the staff at Nobeyama Radio Observatory for help with the observations. Particularly, we are grateful to Dr Hiroyuki Kaneko for his help with the continuum observations. MA thanks Grant-in-Aid for Scientific Research on Innovative Areas (Grant No. 25108002), Grant-in-Aid for Scientific Research (C) (Grant Nos. 15K05395 and 18K05045) and The Mitsubishi Foundation.

#### DATA AVAILABILITY

The data underlying this article will be shared on reasonable request to the corresponding author.

#### REFERENCES

- Akabane K. et al. 1988, PASJ, 40, 459  
 Andersson M., Askne J., Hjalmarsen A., 1984, A&A, 136, 243  
 Araki M., Niwayama K., Tsukiyama K., 2014, AJ, 148, 87  
 Belloche A., Müller H. S. P., Menten K. M., Schilke P., Comito C., 2013, A&A, 559, 47  
 Boucher D., Burie J., Bauer A., Dubrulle A., Demaison J., 1980, J. Phys. Chem. Ref. Data, 9, 659  
 Campbell E. K., Holz M., Gerlich D., Maier J. P., 2015, Nature, 523, 322  
 Campbell E. K. et al., 2016, ApJ, 822, 17  
 Cazaux S., Tielens A. G. G. M., Ceccarelli C., Castets A., Wakelam V., Caux E., Parise B., Teyssier D., 2003, ApJ, 593, L51  
 Cazzoli G., Puzzarini C., 2006, J. Mol. Spectrosc., 240, 153  
 Churchwell E., Hollis J. M., 1983, ApJ, 272, 591  
 Corby J. F. et al., 2015, MNRAS, 452, 3969  
 Cox P., Guesten R., Henkel C., 1988, A&A, 206, 108  
 Cummins S. E., Green S., Thaddeus P., Linke R. A., 1983, ApJ, 266, 331  
 de Vicente P., Martin-Pintado J., Wilson T. L., 1997, A&A, 320, 957  
 Gadhi J., Lahrouni A., Legrand J., Demaison J., 1995, J. Chim. Phys., 92, 1984  
 Garrod R. T., Williams D. A., Hartquist T. W., Rawlings J. M. C., Viti S., 2005, MNRAS, 356, 654  
 Garrod R. T., Williams D. A., Rawlings J. M. C., 2006, MNRAS, 373, 577  
 Goldsmith P. F., Lis D. C., Hills R., Lasenby J., 1990, ApJ, 350, 186  
 Gratier P. et al., 2016, ApJS, 225, 25

- Greaves J. S., White G J., Ohishi M., Hasegawa T., Sunada K., 1992, *A&A*, 260, 381
- Green S., 1986, *ApJ*, 309, 331
- Herbst E., van Dishoeck E. F., 2009, *ARA&A*, 47, 427
- Hollis J. M., 1982, *ApJ*, 260, 159
- Hollis J. M., Jewell P. R., Lovas F. J., Remijan A., Møllendal H., 2004, *ApJ*, 610, L12
- Hollis J. M. et al., 2006a, *ApJ*, 643, L25
- Hollis J. M., Remijan A J., Jewell P. R., Lovas F. J., 2006b, *ApJ*, 642, 933
- Hüttemeister S., Wilson T. L., Henkel C., Mauersberger R., 1993, *A&A*, 276, 445
- Hüttemeister S. et al., 1995, *A&A*, 294, 667
- Jørgensen J. K. et al., 2016, *A&A*, 595, 117
- Kalenskii S. V., Johansson L. E. B., 2010, *Astron. Rep.*, 54, 1084
- Kamazaki T. et al., 2012, *PASJ*, 64, 29
- uno N. et al., 2011, in Piorgio L. E., ed., XXXth URSI General Assembly and Scientific Symposium , IEEE, New York, p. JP2
- Leiden Atomic and Molecular Database, 2020, available at: <https://home.strw.leidenuniv.nl/~moldata/>
- Lilley A. E., Palmer P., 1968, *ApJS*, 16, 143
- Lis D. C. et al., 2014, *ApJ*, 785, 135
- Liszt H. S., Pety J., 2012, *A&A*, 541, 58
- Liszt H., Gerin M., Beasley A., Pety J., 2018, *ApJ*, 856, 151
- Liszt H., Sonnentrucker P., Cordiner M., Gerin M., 2012, *ApJ*, 753, L28
- Liu S.-Y., Snyder L. E., 1999, *ApJ*, 523, 683
- Loomis R. A. et al., 2013, *ApJ*, 765, L9
- Loren R. B., Mundy L. G., 1984, *ApJ*, 286, 232
- Mäder H., Bomsdorf H., Andresen U., 1979, *Z. Nat. A*, 34, 850
- McGuire B. A. et al., 2016, *Sci*, 352, 1449
- Menten K. M. et al., 2011, *A&A*, 525, 77
- Minamidani T. et al., 2016, in Holland W. S., Zmuidzinas J., eds, Proc. SPIE Conf. Ser. Vol. 9914, Millimeter, Submillimeter, and Far-Infrared Detectors and Instrumentation for Astronomy VIII, SPIE, Bellingham, p. 99141Z
- Müller H. S. P., Schöder F., Stutzki J., Winnewisser G., 2005, *J. Molecular Structure*, 742, 215
- Müller H. S. P., Thorwirth S., Roth D. A., Winnewisser G., 2001, *A&A*, 370, L49
- Nagy Z., van der Tak F. F. S., Fuller G. A., Plume R., 2015, *A&A*, 577, 127
- Ohishi M. et al., 1996, *ApJ*, 471, 610
- Oka T. et al., 2013, *ApJ*, 773, 42
- Pols S. et al., 2018, *A&A*, 614, 123
- Pratap P. et al., 1997, *ApJ*, 486, 862
- Price R. J., Viti S., Williams D. A., 2003, *MNRAS*, 343, 1257
- Remijan A. J. et al., 2008, *ApJ*, 675, L85
- Requena-Torres M. A. et al., 2006, *A&A*, 455, 971
- Requena-Torres M. A., Martín-Pintado J., Martín S., Morris M. R., 2008, *ApJ*, 672, 352
- Schöier F. L., van der Tak F. F. S., van Dishoeck E. F., Black J. H. 2005, *A&A*, 432, 369
- Sonnentrucker P. et al., 2010, *A&A*, 521, L12
- Snyder L. E., Hollis J. M., Jewell P. R., Lovas F. J., Remijan A., 2006, *ApJ*, 647, 412
- Thiel V., Belloche A., Menten K. M., Garrod R. T., Müller H. S. P., 2017, *A&A*, 605, 6
- Thiel V. et al., 2019, *A&A*, 623, 68
- Turner B. E., 1991, *ApJS*, 76, 617
- Tsuboi M. et al., 2008, *PASJ*, 60, 465
- Walker G. A. H., Bohlender D. A., Maier J. P., Campbell E. K., 2015, *ApJ*, 812, L8
- Walmsley C. M., Ungerechts H., 1983, *A&A*, 122, 164
- White G J., Araki M., Greaves J. S., Ohishi M., Higginbottom N. S., 2003, *A&A*, 407, 589
- Zaleski D. P. et al., 2013, *ApJ*, 765, L10

## SUPPORTING INFORMATION

Supplementary data are available at *MNRAS* online.

### Reprint Permission c20-039-Araki.pdf

Please note: Oxford University Press is not responsible for the content or functionality of any supporting materials supplied by the authors. Any queries (other than missing material) should be directed to the corresponding author for the article.

## APPENDIX

### A1 ABSORPTION LINES OF CH<sub>3</sub>CN

This section presents the theoretical basis of the hot axis effect. Under a non-Boltzmann distribution in interstellar space, the number density  $n(J)$  of each rotational level of a molecule depends on a radiational temperature,  $T_r$ , a kinetic temperature,  $T_k$ , optical depths of rotational transitions and the rate of collision-induced rotational transitions,  $C$ . If no radiative sources exist around a cloud of relatively high density, an important factor is a set of optical depths rather than the radiational temperature of 2.7 K, the cosmic background temperature (Andersson et al. 1984). In this work, however, radiative sources exist around a cloud of relatively low density; therefore, the radiational temperature becomes an important variable to be determined by the following excitation calculations. We used a method based on equation (7) of Araki et al. (2014) for the number density. This equation holds for  $J > K_a$ , i.e.  $J = 4, 5, 6, \dots$  in the case of  $K_a = 3$ , a near-prolate molecule with  $C_{2v}$  symmetry, and  $n(0)$  in this equation means  $n(K_a)$  to be exact. In the case of a symmetric-top molecule, the equation must be modified by replacing the rotational quantum number,  $K_a$ , with  $K$ , and the rotational constant,  $\bar{B}$  ( $= (B + C^*)/2$ ,  $C^*$ : the rotational constant), with  $B$ , as follows:

$$n(J, K) = n(K, K) \prod_{m=K+1}^J \left[ \frac{\alpha B^3 \mu^2 \frac{m^3 S}{2m-1} \frac{1}{\exp(2hBm/kT_r)-1} + C \sqrt{\frac{2m+1}{2m-1}} \exp(-hBm/kT_k)}{\alpha B^3 \mu^2 \frac{m^3 S}{2m+1} \left(1 + \frac{1}{\exp(2hBm/kT_r)-1}\right) + C \sqrt{\frac{2m-1}{2m+1}} \exp(hBm/kT_k)} \right] \quad (\text{A1})$$

for  $J > K$ , where  $n(J, K)$  is the number density,  $\alpha = 2^7 \pi^3/3 \epsilon_0 h c^3$  is in SI units,  $\epsilon_0$  is the dielectric constant,  $h$  is the Planck constant,  $c$  is the speed of light,  $k$  is the Boltzmann constant,  $S$  is the transition strength and  $\mu$  is the permanent dipole moment in Cm (1 D =  $3.33564 \times 10^{-30}$  Cm). We note that an excitation temperature  $T_{\text{ex}}$  of the  $J$  rotation for each  $K$  stack has the relationship  $T_r < T_{\text{ex}} < T_k$ , with  $T_{\text{ex}}$  being closer to  $T_k$  when  $C$  is large and closer to  $T_r$  when  $C$  is small.

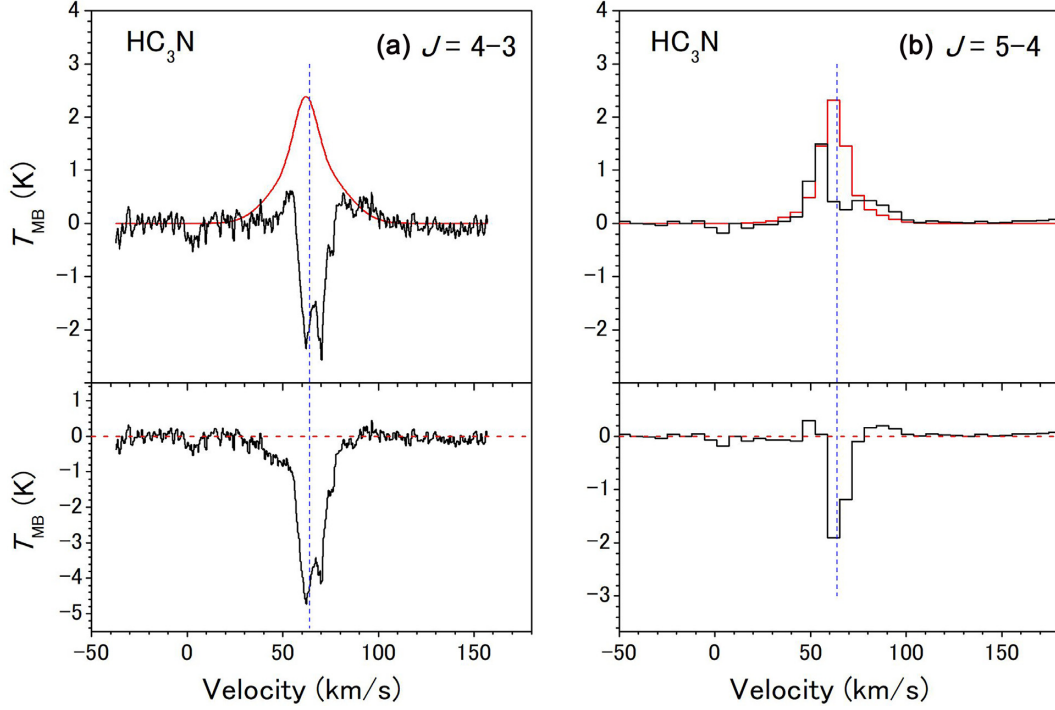

**Figure A1.** Absorption lines (lower panels) of  $\text{HC}_3\text{N}$ . The  $J = 4-3$  line was observed using the 100-m telescope of the MPIfR by Hüttemeister et al. (1995). This spectrum is reprinted from their article with permission of ESO. The  $J = 5-4$  line was obtained using the Nobeyama 45-m telescope in this work. The black lines in the upper panels are the observed spectra. The red lines in the upper panels are the expected emission profiles using the parameters of  $\text{HC}_3\text{N}$  in table 86 of Belloche et al. (2013). The lower panels depict the absorption profiles after subtracting the emission profiles. The blue dotted lines are at  $64 \text{ km s}^{-1}$ .

The population corresponding to the total column density,  $N$ , is distributed to all  $K$  stacks based on a simple Boltzmann distribution at  $T_k$ . As a result, each  $K$  stack obtains a column density,  $N_K$ , where

$$N = \sum_{K=0}^{\infty} N_K. \quad (\text{A2})$$

The number densities,  $n(J, K)$ , for the respective  $J$  levels in each  $K$  stack are redistributed using equation (A1). The column density,  $N_{J,K}$ , of each rotational level is

$$N_{J,K} = N_K n(J, K) / \sum_{j=K}^{\infty} n(j, K), \quad (\text{A3})$$

where  $n(K, K)$  in equation (A1) is cancelled by reduction.

Using the derived number densities, the intensity of an absorption line for a symmetric-top molecule in cgs units can be calculated by the conventional relationships between the column densities,  $N_{J+1, K}$  and  $N_{J, K}$ , the optical depth,  $\tau_{J+1, K \leftarrow J, K}$ , of the  $(J+1)_K \leftarrow J_K$  transition and the Einstein  $B$  coefficient:

$$\int \tau_{J+1, K \leftarrow J, K} dv = \frac{8\pi^3}{3h} \mu^2 S \left[ \frac{N_{J, K}}{g_J} - \frac{N_{J+1, K}}{g_{J+1}} \right] \quad \text{in cm s}^{-1} (v : \text{velocity}), \quad (\text{A4})$$

where  $\mu$  is in Debye ( $10^{-18}$  esu),  $S = \frac{(J+1)^2 - K^2}{J+1}$  and  $g_J = 2J + 1$ .

For  $\text{CH}_3\text{CN}$  in diffuse and translucent clouds, the  $J_K = 4_3-3_3$  transition produces the strongest absorption line, where  $\mu = 3.9220 \text{ D}$  (Gadhi et al. 1995) and  $B = 9198.9 \text{ MHz}$  (Cazzoli & Puzzarini 2006). This is because (1) the  $J = 1-0, 2-1$  and  $3-2$  transitions do not have sufficient population advantages at lower  $J$  levels compared with upper ones; (2) the higher  $J$  levels of  $J \geq 4$  are disadvantaged compared with the  $J = 3$  level for obtaining populations; and (3) nuclear spin statistical weights of  $K = 3n$  ( $n = 0, 1, 2, \dots$ ) levels are twice those of  $K \neq 3n$ . Therefore, we have selected the  $J = 4-3$  transition at  $73.6 \text{ GHz}$  to observe absorption lines of  $\text{CH}_3\text{CN}$  in diffuse and translucent clouds. As a supplement, in transitions other than  $J = K$ , such as  $J_K = 4_3-3_3$ , the  $K = 0$  and  $1$  transitions in each  $(J+1)_K - J_K$  transition can merge to create a single, strong absorption peak.

## A2 ABSORPTION LINES OF $\text{HC}_3\text{N}$ TOWARD SGR B2(M)

For comparison in discussing the abundances of organic molecules, we focused on  $\text{HC}_3\text{N}$  and  $\text{CH}_3\text{CN}$ . To obtain the column density of  $\text{HC}_3\text{N}$  in the envelope of Sgr B2(M), we used the spectra of the  $J = 4-3$  line observed using the 100-m telescope at the Max Planck Institute for Radio Astronomy (MPIfR), reported by Hüttemeister et al. (1995). We also report in this work a new observation of the  $J = 5-4$  line using the 45-m



**Table A1.** Comparison of abundances in dense, translucent and diffuse clouds.

| Species                         | Sgr B2(M)<br>Envelope <sup>c</sup>                                 | Sgr B2(M)<br>Core <sup>d</sup> | TMC-1 CP                 | Toward<br>B2200 <sup>a</sup> | GC1 <sup>b</sup>        | GC2 <sup>b</sup>       | GC3 <sup>b</sup>        | Scutum <sup>b</sup>     |
|---------------------------------|--------------------------------------------------------------------|--------------------------------|--------------------------|------------------------------|-------------------------|------------------------|-------------------------|-------------------------|
|                                 | Column density (cm <sup>-2</sup> )                                 |                                |                          |                              |                         |                        |                         |                         |
| H <sup>13</sup> CO <sup>+</sup> | 1.4 × 10 <sup>14e</sup>                                            | 3.72 × 10 <sup>14f</sup>       | 1.45 × 10 <sup>12g</sup> | 4.2 × 10 <sup>10</sup>       | 1.5 × 10 <sup>12</sup>  | 8.0 × 10 <sup>12</sup> | 3.8 × 10 <sup>12</sup>  | 6.2 × 10 <sup>11</sup>  |
| c-C <sub>3</sub> H <sub>2</sub> | 1.9 × 10 <sup>14e</sup>                                            | 2.60 × 10 <sup>14f</sup>       | 1.9 × 10 <sup>13h</sup>  | 1.5 × 10 <sup>12</sup>       | 5.0 × 10 <sup>12</sup>  | 1.9 × 10 <sup>13</sup> | 1.2 × 10 <sup>13</sup>  | 8.1 × 10 <sup>12</sup>  |
| CH <sub>3</sub> OH              | 3.83 × 10 <sup>15f</sup>                                           | 1.63 × 10 <sup>16f</sup>       | 1.4 × 10 <sup>13h</sup>  | <5 × 10 <sup>11</sup>        | 3.8 × 10 <sup>14</sup>  | 3.8 × 10 <sup>14</sup> | 2.1 × 10 <sup>14</sup>  | 6.2 × 10 <sup>13</sup>  |
| CH <sub>3</sub> CN              | 1.4 × 10 <sup>14i</sup>                                            | 2.69 × 10 <sup>14f</sup>       | 4.1 × 10 <sup>12h</sup>  | 7 × 10 <sup>10</sup>         | 1.0 × 10 <sup>13</sup>  | 2.0 × 10 <sup>13</sup> | <6.0 × 10 <sup>13</sup> | 1.4 × 10 <sup>13</sup>  |
| HC <sub>3</sub> N               | 4 × 10 <sup>13j</sup>                                              | 4.50 × 10 <sup>14f</sup>       | 2.3 × 10 <sup>14h</sup>  | <4 × 10 <sup>10</sup>        | <2.5 × 10 <sup>13</sup> | 6.0 × 10 <sup>14</sup> | <2.5 × 10 <sup>13</sup> | <2.5 × 10 <sup>13</sup> |
|                                 | log <sub>10</sub> {N(species)/N(H <sup>13</sup> CO <sup>+</sup> )} |                                |                          |                              |                         |                        |                         |                         |
| H <sup>13</sup> CO <sup>+</sup> | 0.0                                                                | 0.0                            | 0.0                      | 0.0                          | 0.0                     | 0.0                    | 0.0                     | 0.0                     |
| c-C <sub>3</sub> H <sub>2</sub> | 0.1                                                                | -0.2                           | 1.1                      | 1.6                          | 0.5                     | 0.4                    | 0.5                     | 1.1                     |
| CH <sub>3</sub> OH              | 1.4                                                                | 1.6                            | 1.0                      | <1.1                         | 2.4                     | 1.7                    | 1.7                     | 2.0                     |
| CH <sub>3</sub> CN              | 0.0                                                                | -0.1                           | 0.4                      | 0.2                          | 0.8                     | 0.4                    | <1.2                    | 1.4                     |
| HC <sub>3</sub> N               | -0.5 <sup>j</sup>                                                  | 0.1                            | 2.2                      | <0.0                         | <1.2                    | 1.9                    | <0.8                    | <1.6                    |

<sup>a</sup>Liszt et al. (2018).<sup>b</sup>Galactic Centre translucent clouds reported by Thiel et al. (2017). GC1, GC2 and GC3 are distinguished by their velocities of approximately 9, 3 and -1 km s<sup>-1</sup>, respectively.<sup>c</sup>64 ± 1 km s<sup>-1</sup>. The moderate density envelope observed by absorption.<sup>d</sup>62 ± 1 km s<sup>-1</sup>. Core observed by emission.<sup>e</sup>Menten et al. (2011).<sup>f</sup>Belloche et al. (2013).<sup>g</sup>Pratap et al. (1997).<sup>h</sup>Gratier et al. (2016)<sup>i</sup>This work.<sup>j</sup>T<sub>ex</sub> = 2.9 K.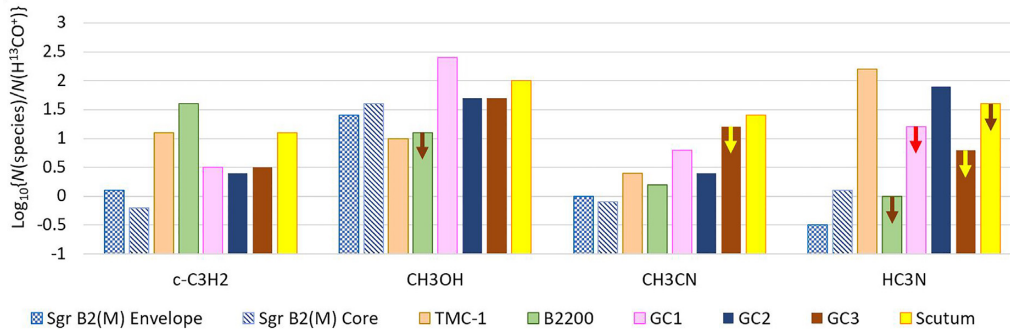**Figure A2.** Comparison of abundances among dense and translucent clouds. All values come from Table A1. Arrows show upper limits.

telescope in Nobeyama. To detect this line at 45.5 GHz, a high electron mobility transistor (HEMT) receiver H40 was used. The main beam efficiency was 0.69 and the beam size was 36.6 arcsec. A channel separation of 488.28 kHz with SAM45 was selected, giving an effective bandwidth of 1600 MHz for each array. The corresponding velocity resolution is 6.43 km s<sup>-1</sup>, sufficient to resolve the rotational profile of the line.

Rotational transitions of HC<sub>3</sub>N also exhibit absorption features at approximately 64 km s<sup>-1</sup>, as displayed in Fig. A1. Although absorption is dominant in the  $J = 4-3$  transition, absorption and emission are mixed in the  $J = 5-4$  transition. To subtract emission lines from the core, the emission profiles of the  $J = 4-3$  and  $5-4$  transitions are estimated using common parameters of temperature, column density, full width at half-maximum (FWHM) and velocity for HC<sub>3</sub>N in table 86 of Belloche et al. (2013), as depicted by the red profiles in Fig. A1. The profile of the lower velocity side of the  $J = 5-4$  lines, with which the absorption line has negligible overlap, is reproduced by these parameters, as illustrated in Fig. A1(b), as well as in the case of the  $J_K = 4_0-3_0$  CH<sub>3</sub>CN line. Thus, the estimated emission profile of the  $J = 4-3$  transition of HC<sub>3</sub>N in Fig. A1(a) is suitable.

The absorption profiles of HC<sub>3</sub>N in the lower panels of Fig. A1 are obtained by removing the emission profiles. The background continuum intensities,  $T_C$ , are 21 K at 36.4 GHz, corresponding to the  $J = 4-3$  transition, and 14 K at 43.4 GHz, observed using the 100-m telescope (Hüttemeister et al. 1995). The intensity of  $T_C = 14$  K can be used as the upper limit of  $T_C$  at 45.5 GHz for the  $J = 5-4$  transition with the 45-m telescope, since the beam size of the 45-m telescope is larger than that of the 100-m instrument. The  $J = 5-4$  absorption line gives the lower limit ( $>3 \times 10^{13}$  cm<sup>-2</sup>) of the column density of HC<sub>3</sub>N according to the local thermodynamic equilibrium equation for absorption lines of a linear molecule described by Greaves et al. (1992). Using the absorption intensity of the  $J = 4-3$  transition, a column density of  $4 \times 10^{13}$

$\text{cm}^{-2}$  is derived based on the assumption of  $T_{\text{ex}} = 2.9$  K, which is  $T_{\text{i}}$  for  $CH_3CN$ . This column density, which varies by 5 per cent per 1 K change of  $T_{\text{C}}$  and by 40 per cent per 1 K increase of  $T_{\text{ex}}$ , is consistent with the lower limit obtained from the  $J = 5-4$  transition.

### A3 ABUNDANCES OF ORGANIC MOLECULES

To understand the history of organic molecules in space, we compare the abundances of organic molecules, including COMs, in different several clouds. In a previous work, Liszt et al. (2018) compared the abundances of five dominant species,  $H^{13}CO^+$ ,  $c\text{-C}_3\text{H}_2$ ,  $CH_3OH$ ,  $CH_3CN$  and  $HC_3N$ , in one dense cloud and several diffuse and translucent clouds; they suggested that the abundances of the organic molecules in diffuse and translucent clouds may be mutually different. We extend this comparison to the envelope and core of Sgr B2 (M).

To compare the abundances of organic molecules based on column-density ratios, the column densities of the organic molecules are normalized by those of  $H^{13}CO^+$ , because the column density of  $H_2$  can be related to the column density of  $H^{13}CO^+$  (Liszt et al. 2018). The densities are listed in Table A1 and displayed in Fig. A2. Despite the difference in absolute densities between the envelope and the Sgr B2(M) core, the relative abundances of COMs are similar. Thus, the abundances of COMs in a relatively low-density region in Sgr B2(M) are thought to be comparable with those in the dense core. Price, Viti and Williams (2003), Garrod et al. (2005), Garrod, Williams and Rawlings (2006) and Thiel et al. (2017) have suggested that interstellar matter is exchanged among dense, translucent and diffuse clouds. The similarity of COM abundances between the envelope and the Sgr B2(M) core can be consistent with this model of interstellar matter exchange. Price et al. (2003) suggested that diffuse clouds produced from diffuse atomic clouds and those produced from dense clouds demonstrate clear differences in chemical composition. This proposal may be supported by the variety of COM abundances among the envelope and diffuse and translucent clouds presented in Table A1 and Fig. A2.

This paper has been typeset from a Microsoft Word file prepared by the author.
